# Supplementary material for: Dynamics of water fluxes and storages in an Alpine karst catchment under current and potential future climate conditions
Source: Copernicus journal article supplement (doi:10.5194/hess-22-3807-2018), 2018-07-18
Supplement: Supplementary file 1 [file hess-22-3807-2018-supplement.zip]

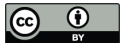

## *Supplement of*

# **Dynamics of water fluxes and storages in an Alpine karst catchment under current and potential future climate conditions**

**Zhao Chen et al.**

*Correspondence to:* Zhao Chen ([zhao.chen@kit.edu](mailto:zhao.chen@kit.edu))

- [hess-22-3807-2018-supplement-title-page.pdf](#)
- Supplementary material - fig S2 impact FDC 0 - 10.tif
- Supplementary material - fig S3 impact FDC 80 - 100.tif
- Supplementary material - result and fig S1.docx
- Supplementary material - table S1.docx

The copyright of individual parts of the supplement might differ from the CC BY 3.0 License.
