# Supplementary material for: Dynamics of water fluxes and storages in an Alpine karst catchment under current and potential future climate conditions
Source: Copernicus journal article supplement (doi:10.5194/hess-22-3807-2018), 2018-07-18
Supplement: Supplementary file 1 [file Supplementary material - table S1.docx]

Table S1 Summary of calibrated model parameters.
