# Supplementary material for: Dynamics of water fluxes and storages in an Alpine karst catchment under current and potential future climate conditions
Source: Copernicus journal article supplement (doi:10.5194/hess-22-3807-2018), 2018-07-18
Supplement: Supplementary file 2 [file hess-22-3807-2018-supplement.zip]

Archive with 5 entries (5 files):
- Supplementary material - fig S2 impact FDC 0 - 10.tif
- Supplementary material - fig S3  impact FDC 80 - 100.tif
- hess-22-3807-2018-supplement-title-page.pdf
- Supplementary material - result and fig S1.docx
- Supplementary material - table S1.docx
