# Supplementary material for: Dynamics of water fluxes and storages in an Alpine karst catchment under current and potential future climate conditions
Source: Copernicus journal article supplement (doi:10.5194/hess-22-3807-2018), 2018-07-18
Supplement: Supplementary file 2 [file hess-22-3807-2018-supplement.zip › Supplementary material - result and fig S1.docx]

**Split-sample test**

We performed a split-sample test to evaluate the stability of the model predictions calibrated with the existing one hydrological year of data. First, half of the data points of the observed time series observed at the four system outlets (QA, QS, QE and SR) were selected from the whole dataset by uniform random bootstrapping and used for model calibration. A bootstrapping strategy rather than a traditional splitting into a calibration and a validation period was chosen in order to include the entire seasonal variability of hydrological conditions. After calibration with the bootstrapped sample, the calibrated model was applied to the excluded observed data set for model validation. The above-mentioned procedure was repeated five times to evaluate the stability of the results. We compared the performance of the model parameter sets validated by means of split-sample tests with the model parameter set calibrated by the multi-step calibration procedure chosen in our study (described in section 3.4). Figure S1 shows that the model parameter set calibrated by multi-step calibration procedure provides an acceptable model performance for all model outlets, which is comparable to the model parameter sets validated by split-samples. We therefore conclude that the parameters that we found by the multi-step calibration procedure are stable and can be used for future projections.


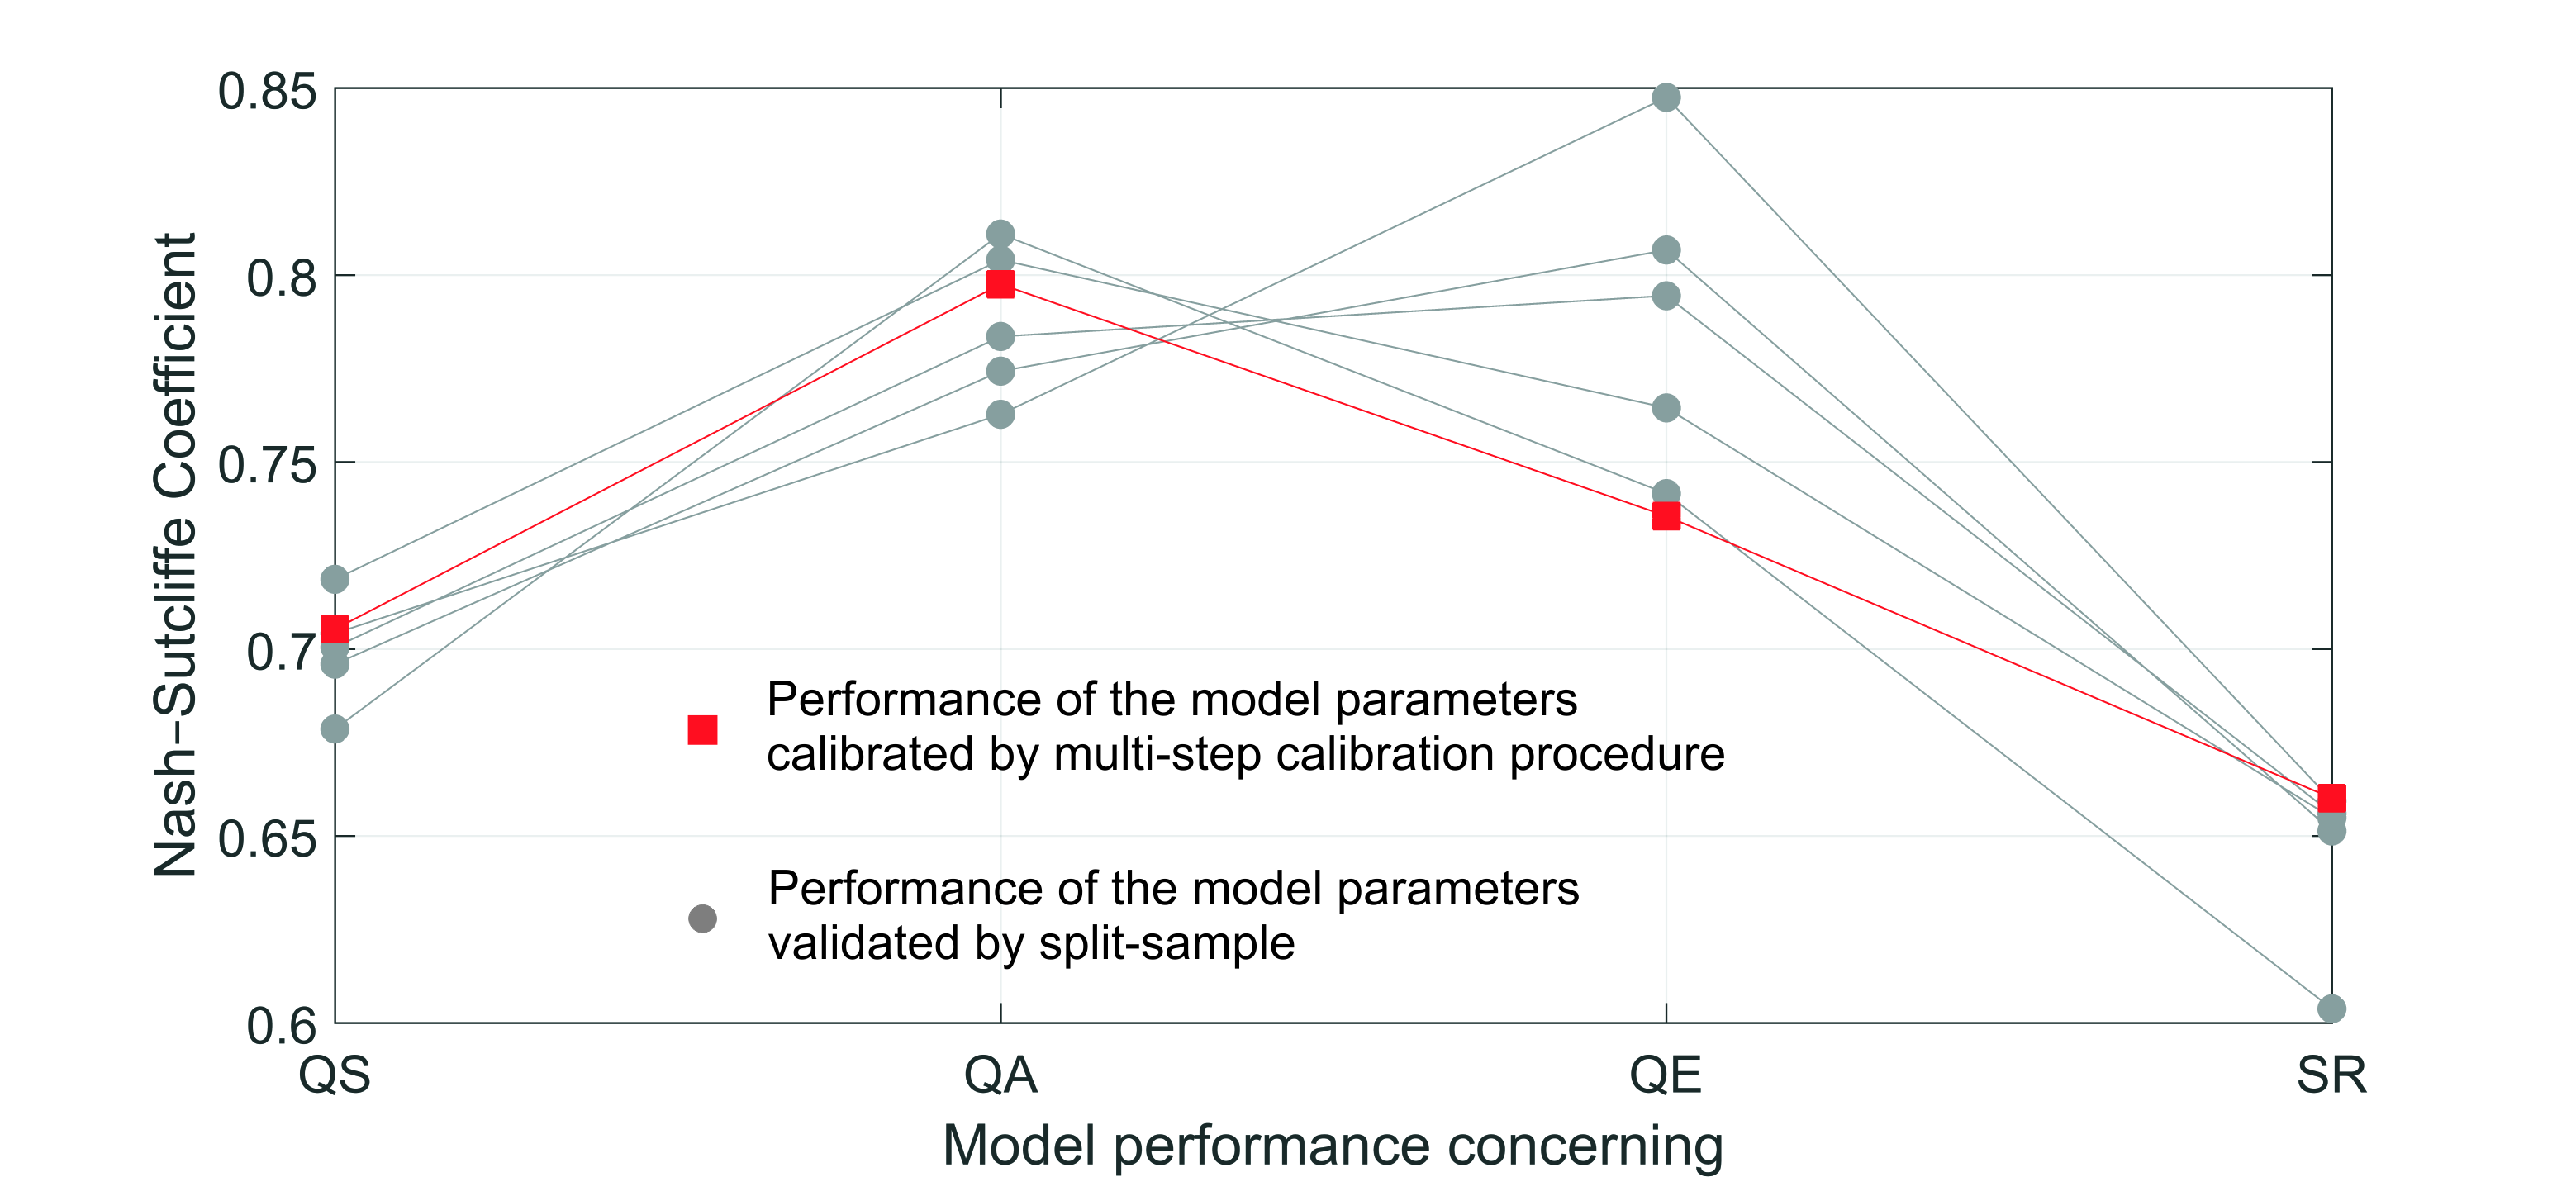


Figure S1 Results of the split-sample test and the model evaluation using multi-step calibration procedure.

References

Chen, Z., Hartmann, A., Goldscheider, N., 2017. A new approach to evaluate spatiotemporal dynamics of controlling parameters in distributed environmental models. Environ. Modell. Softw. 87, 1–16. 10.1016/j.envsoft.2016.10.005.
