# Supplementary figures and images for: Dynamics of water fluxes and storages in an Alpine karst catchment under current and potential future climate conditions
Source: Copernicus journal article supplement (doi:10.5194/hess-22-3807-2018), 2018-07-18

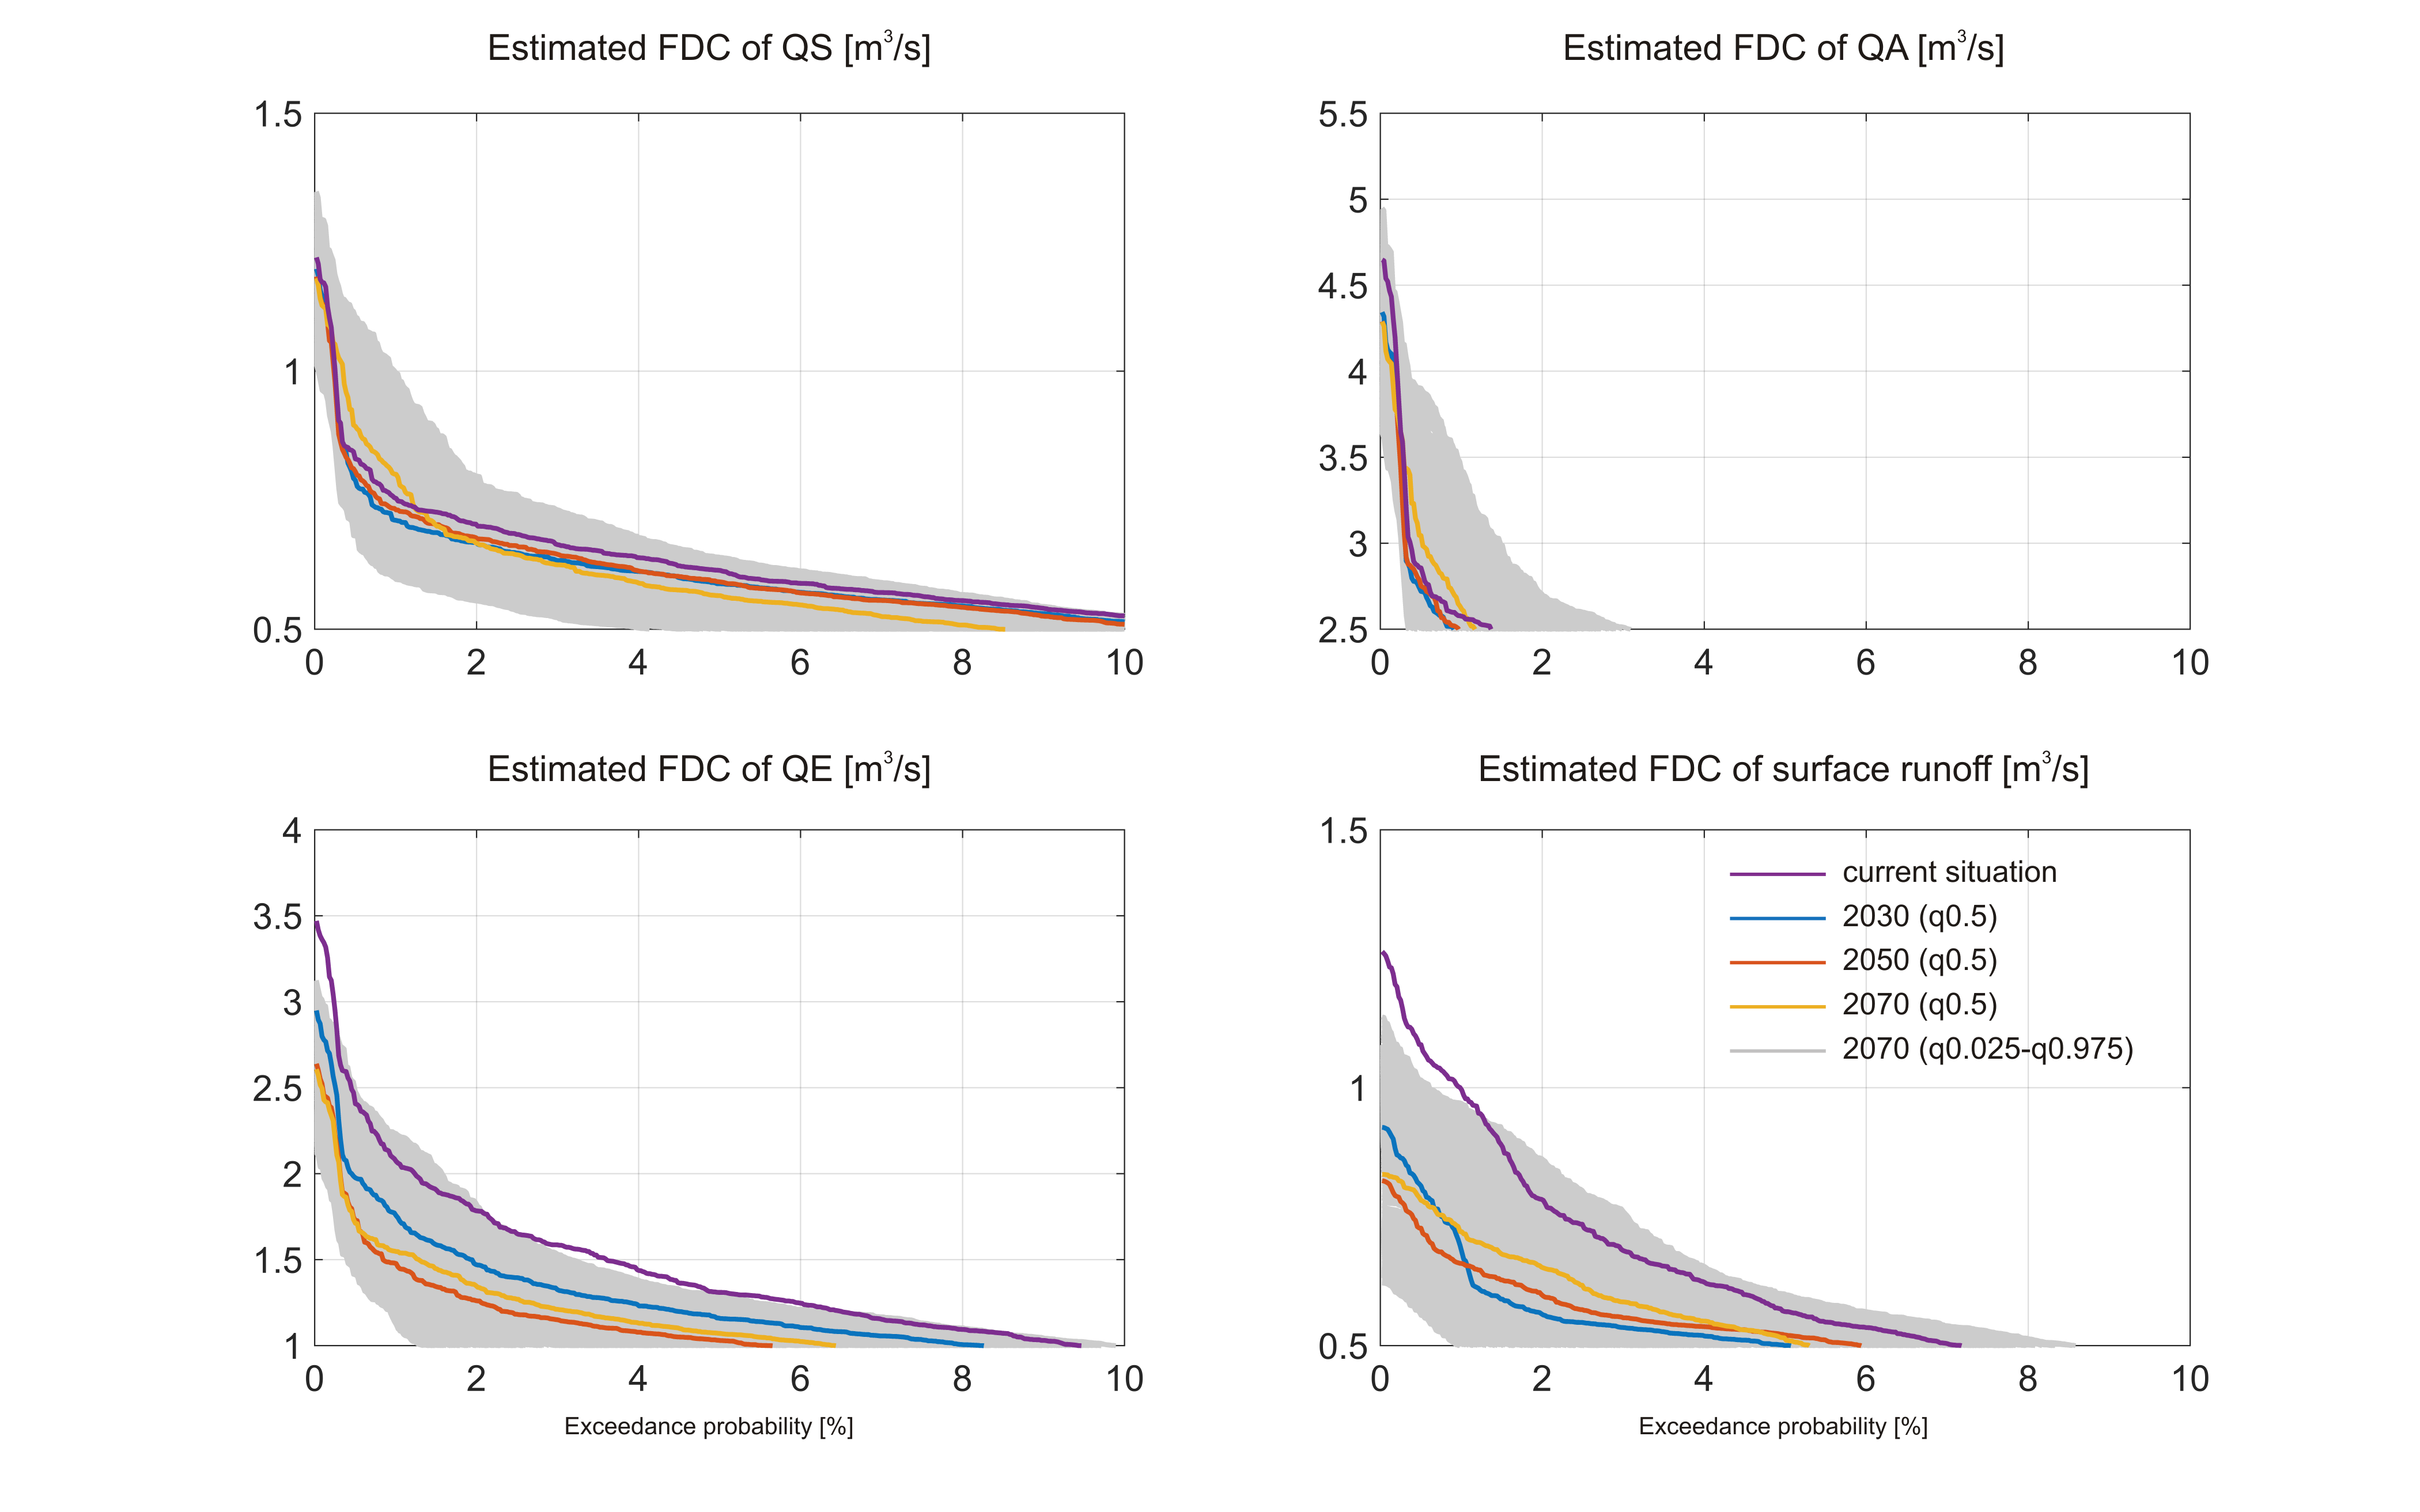

Supplement: Supplementary file 2 [file hess-22-3807-2018-supplement.zip › Supplementary material - fig S2 impact FDC 0 - 10.tif]

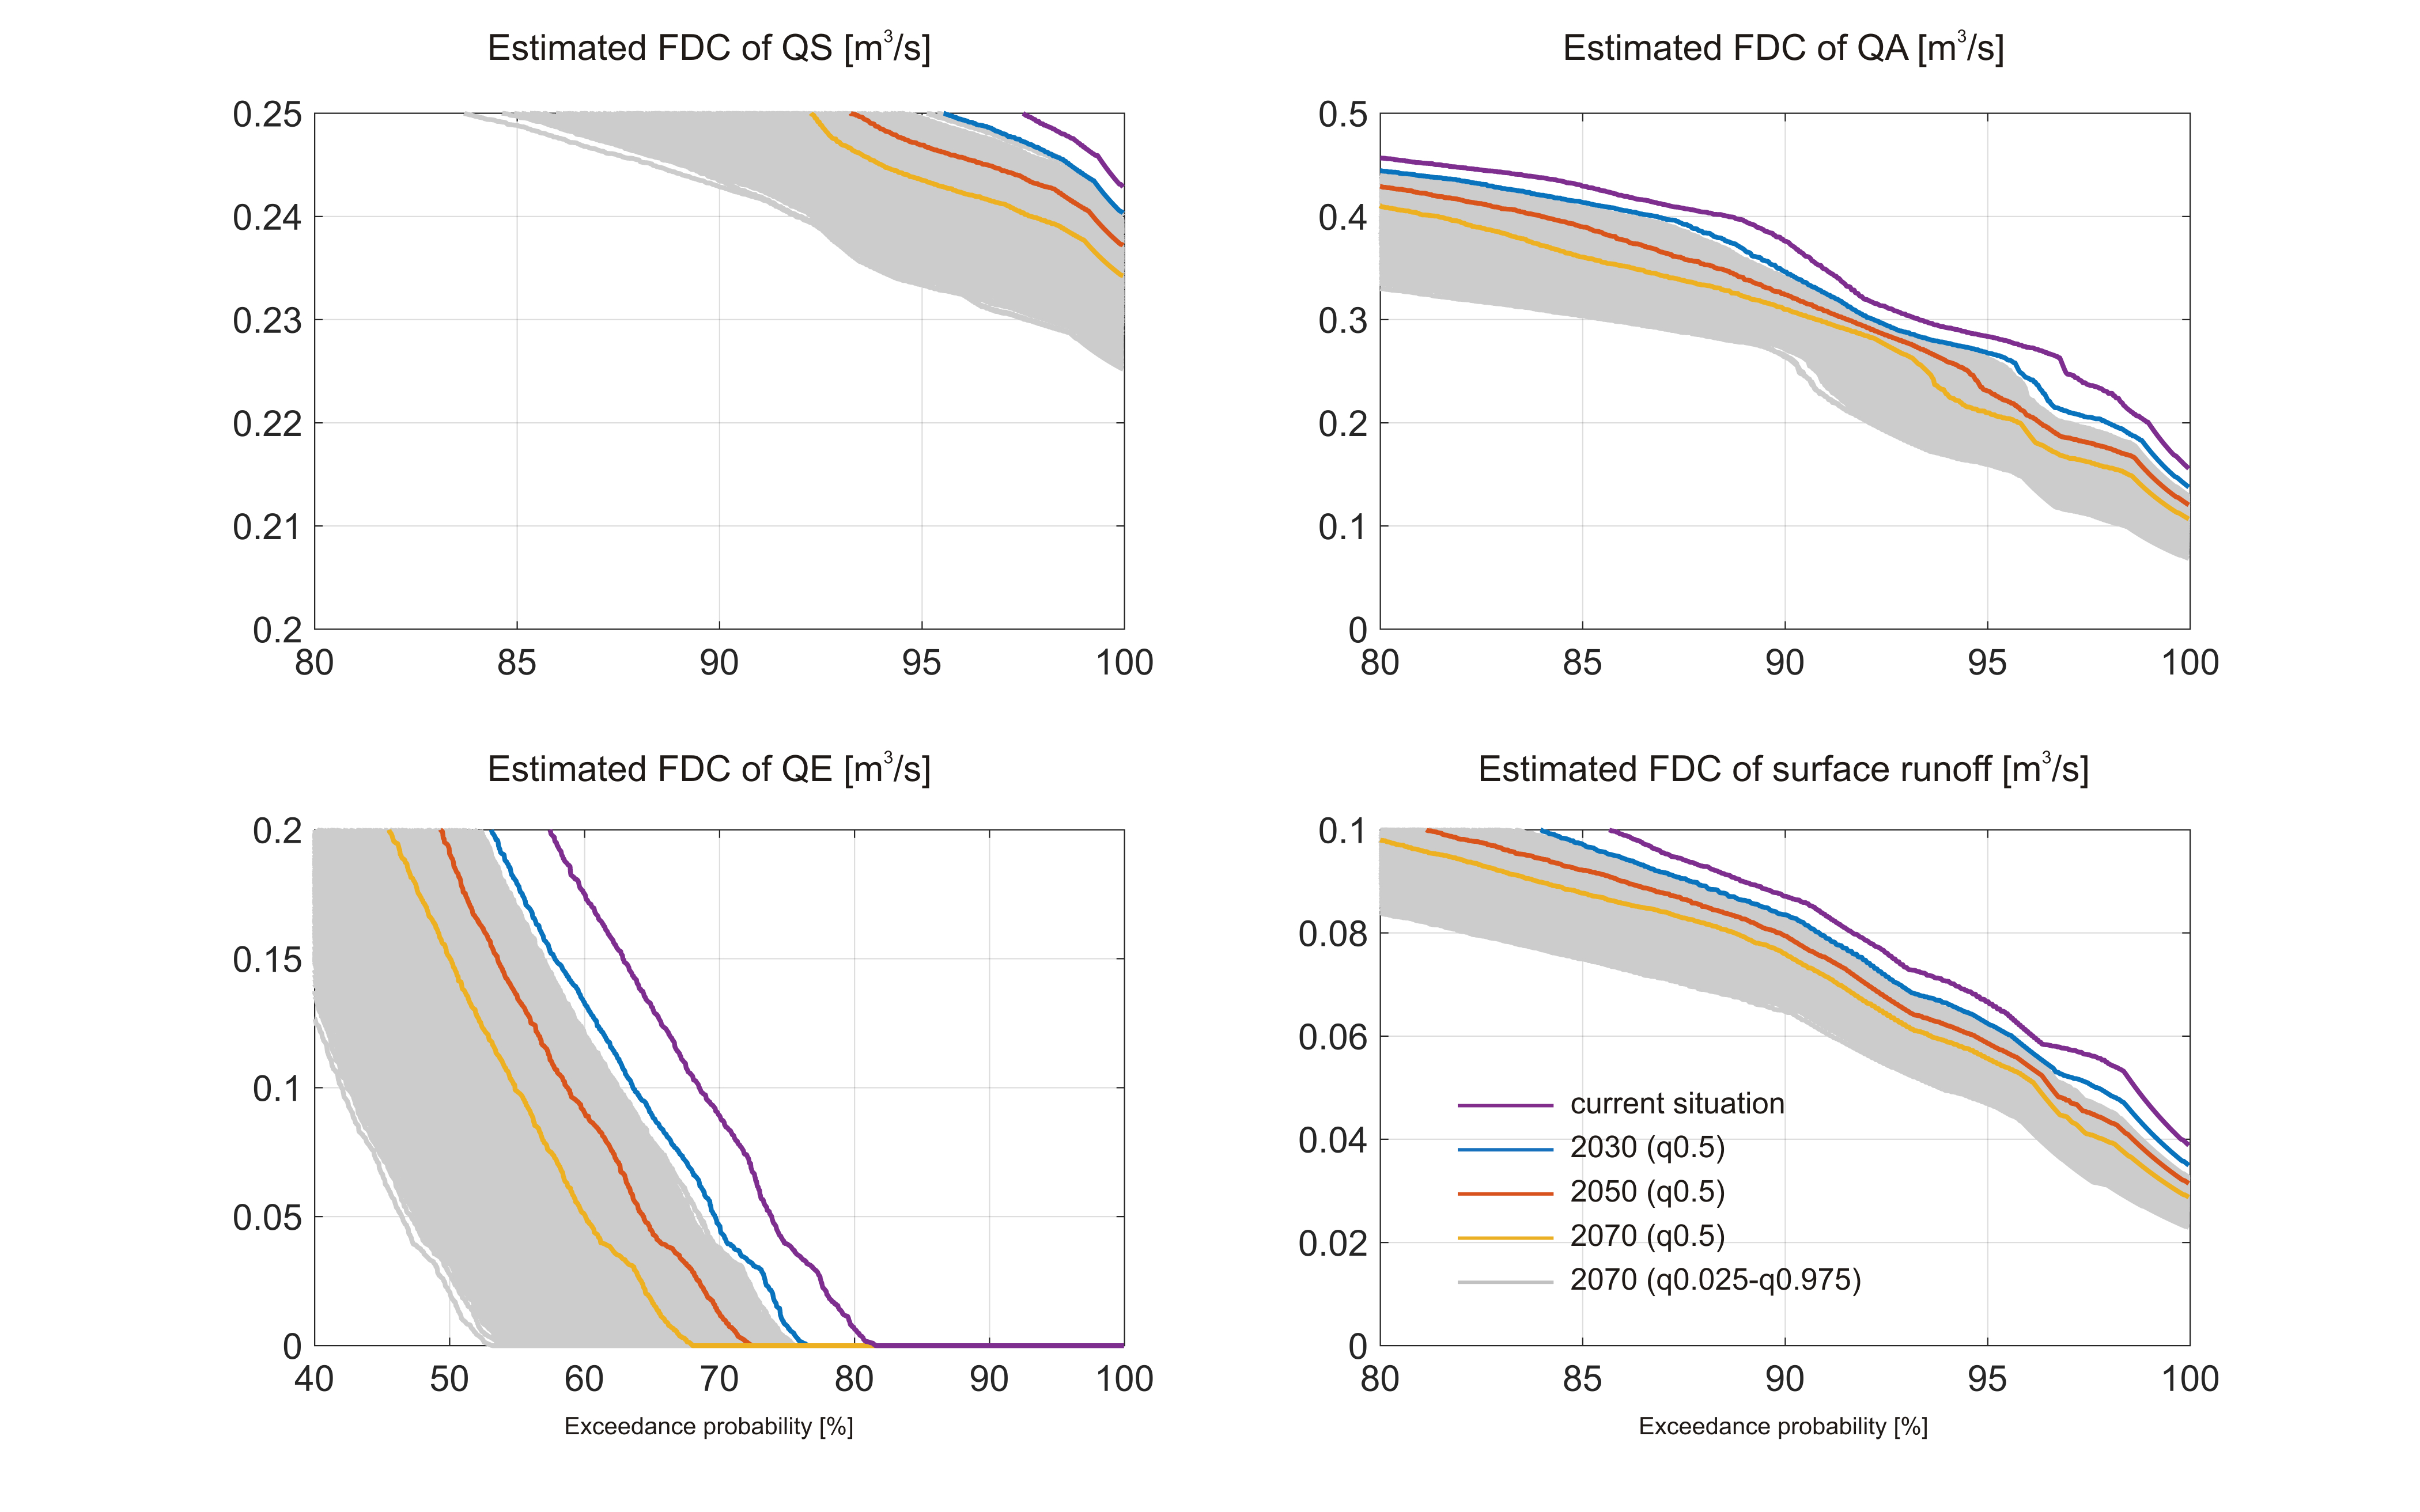

Supplement: Supplementary file 2 [file hess-22-3807-2018-supplement.zip › Supplementary material - fig S3 impact FDC 80 - 100.tif]
